# Supplementary material for: Prognostic value of PD-L1 in esophageal squamous cell carcinoma: a meta-analysis
Source: PubMed Central journal article supplement (PMC5862626; doi:10.18632/oncotarget.23810), 2017-12-27
Supplement: oncotarget-09-13920-s001.pdf [file oncotarget-09-13920-s001.pdf]

# Prognostic value of PD-L1 in esophageal squamous cell carcinoma: a meta-analysis

## SUPPLEMENTARY MATERIALS

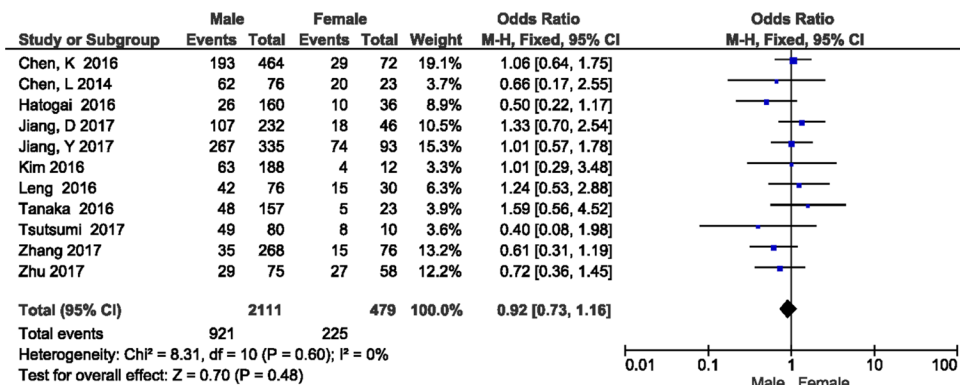

Supplementary Figure 1: Forest plot describing the association between PD-L1 expression and gender.

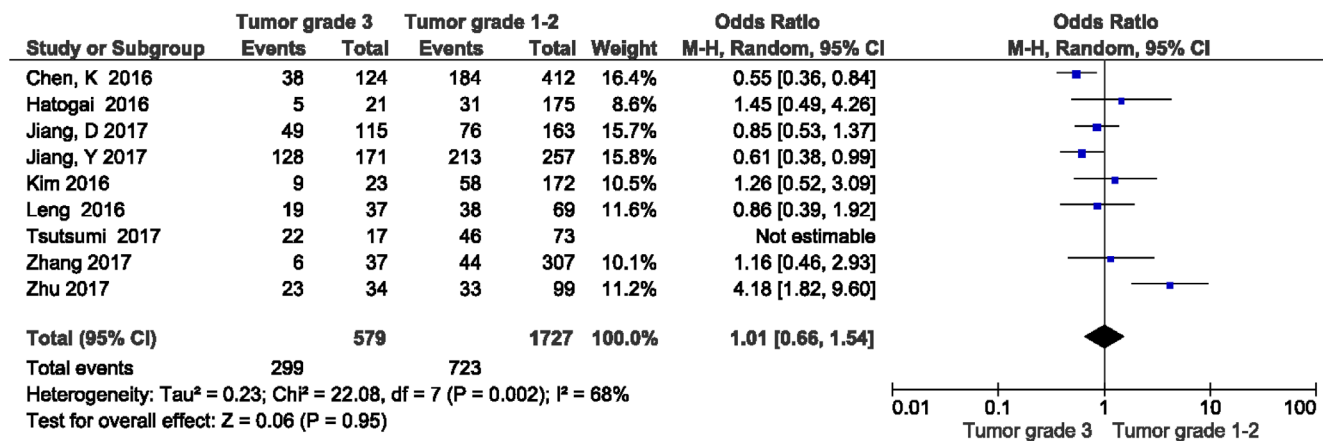

Supplementary Figure 2: Forest plot describing the association between PD-L1 expression and tumor differentiation.

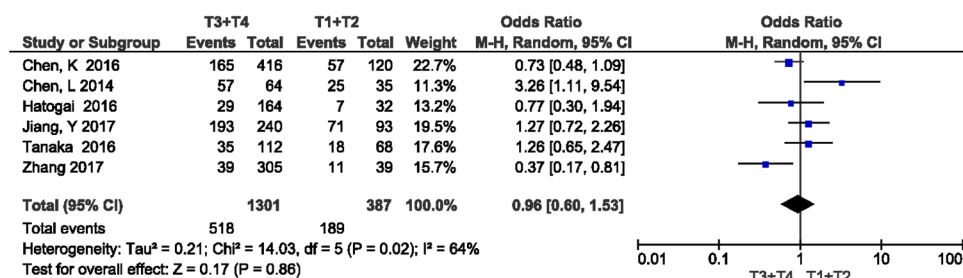

Supplementary Figure 3: Forest plot describing the association between PD-L1 expression and T stage.

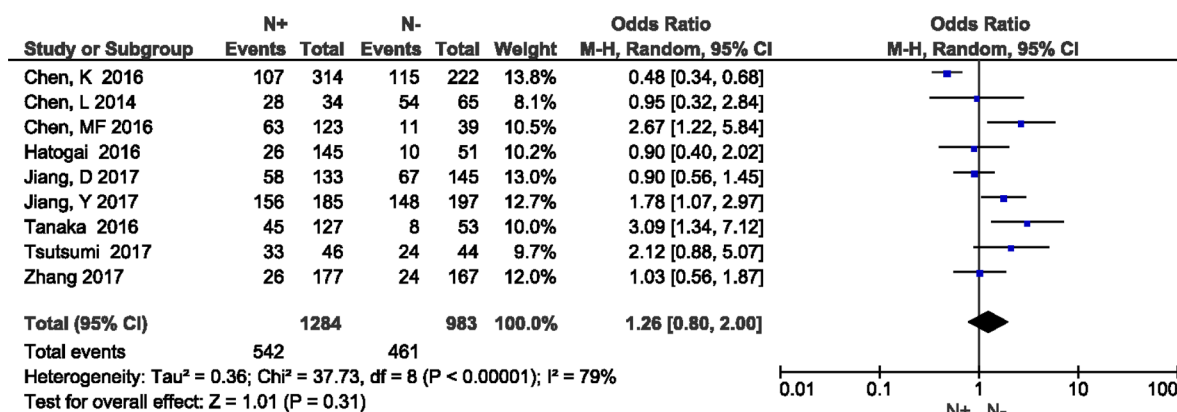

Supplementary Figure 4: Forest plot describing the association between PD-L1 expression and N stage.

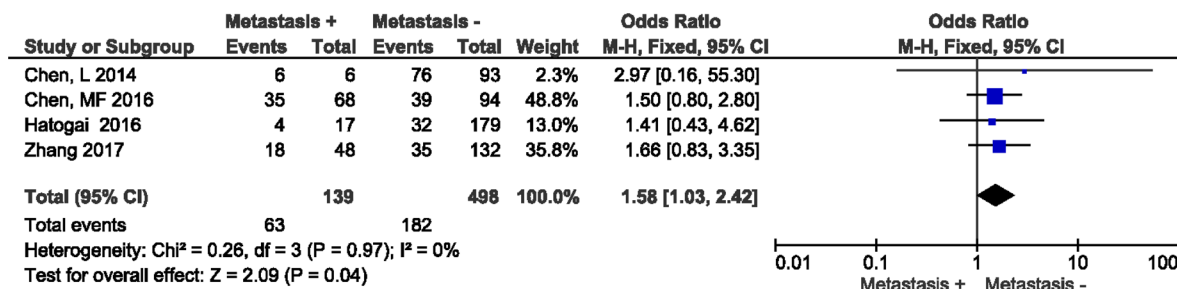

Supplementary Figure 5: Forest plot describing the association between PD-L1 expression and metastasis.

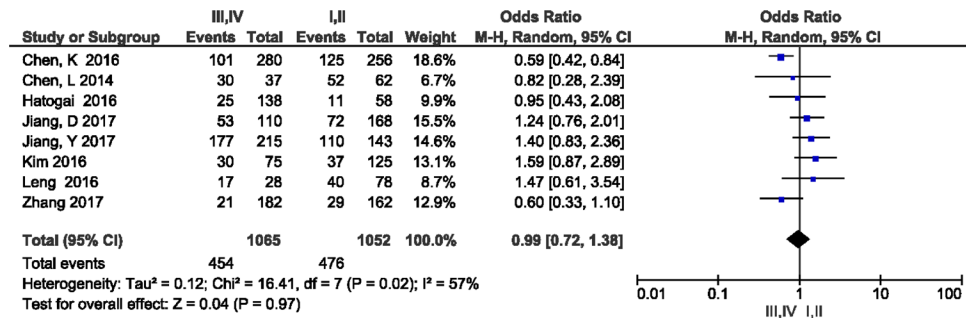

Supplementary Figure 6: Forest plot describing the association between PD-L1 expression and TNM stage.

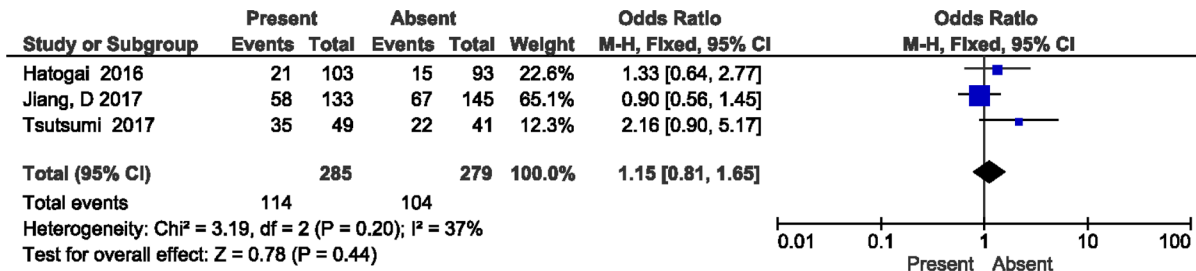

Supplementary Figure 7: Forest plot describing the association between PD-L1 expression and lymphatic invasion.

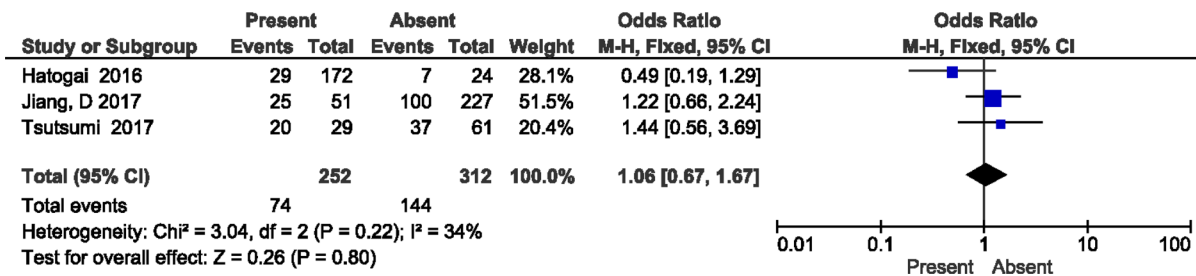

Supplementary Figure 8: Forest plot describing the association between PD-L1 expression and venous invasion.

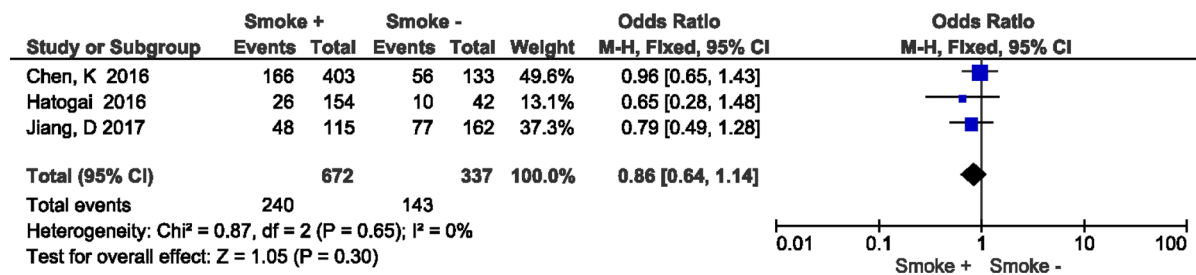

Supplementary Figure 9: Forest plot describing the association between PD-L1 expression and smoking.

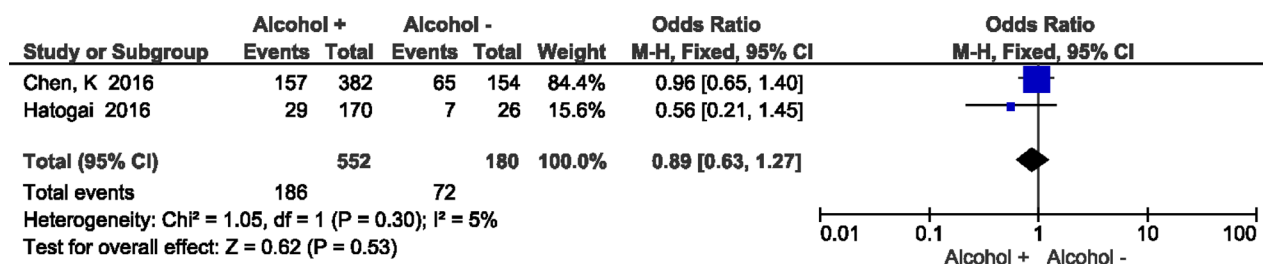

Supplementary Figure 10: Forest plot describing the association between PD-L1 expression and drinking.

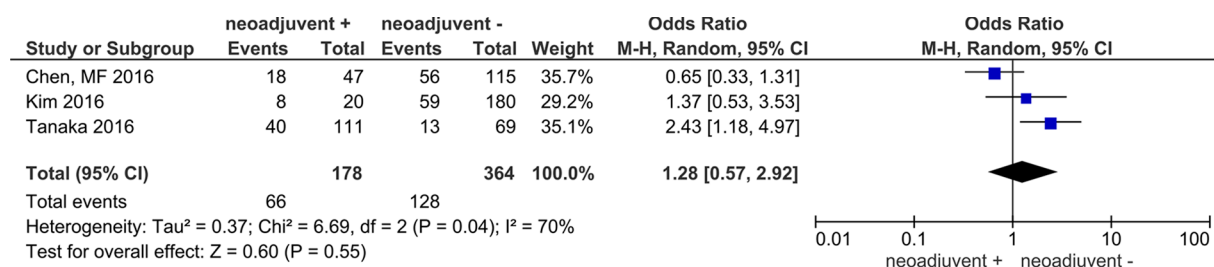

Supplementary Figure 11: Forest plot describing the association between PD-L1 expression and neoadjuvant treatment.
